# Supplementary material
Source: MDPI journal article supplement (https://www.mdpi.com/2073-4344/12/10/1256)
Supplement: s1 [file s1]

## Electronic Supplementary Information

### Visible light active magnesium silicate-graphitic carbon nitride nanocomposites for methylene blue degradation and $\text{Pb}^{2+}$ adsorption

Muhmmmed Ali Alnassar, Abdulmohsen Alshehri, Katabathini Narasimharao\*

Chemistry Department, Faculty of Science, King Abdulaziz University, P.O. Box 80203, Jeddah 21589, Saudi Arabia

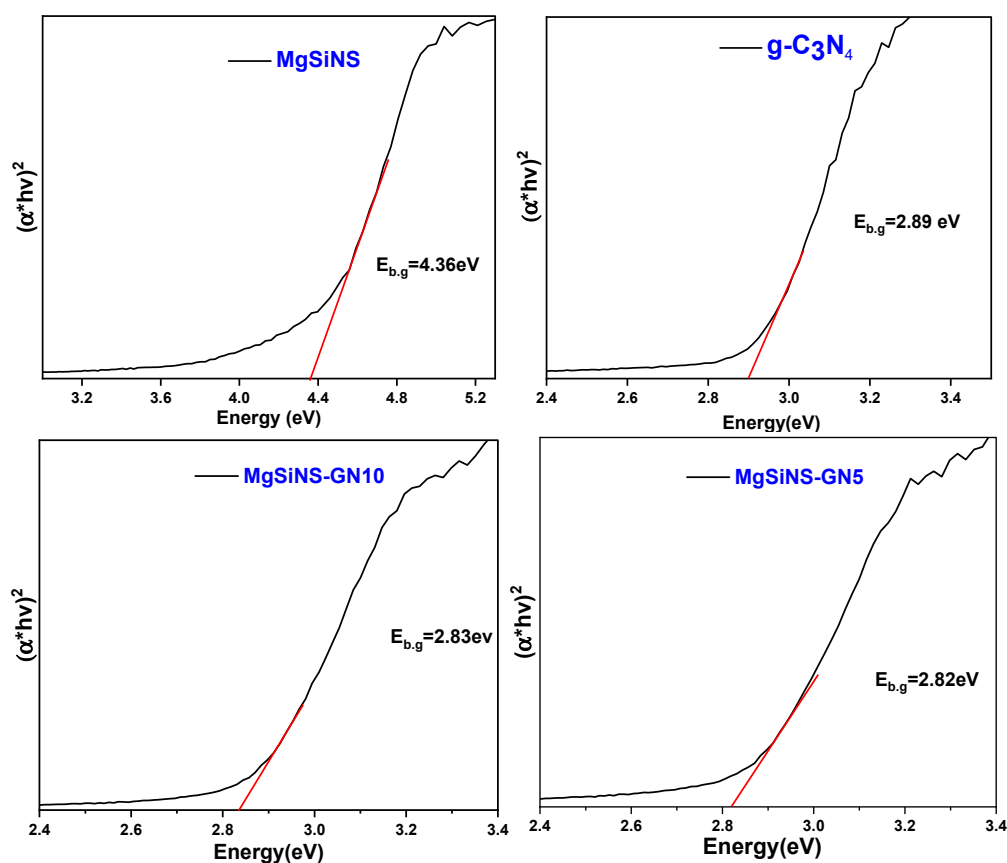

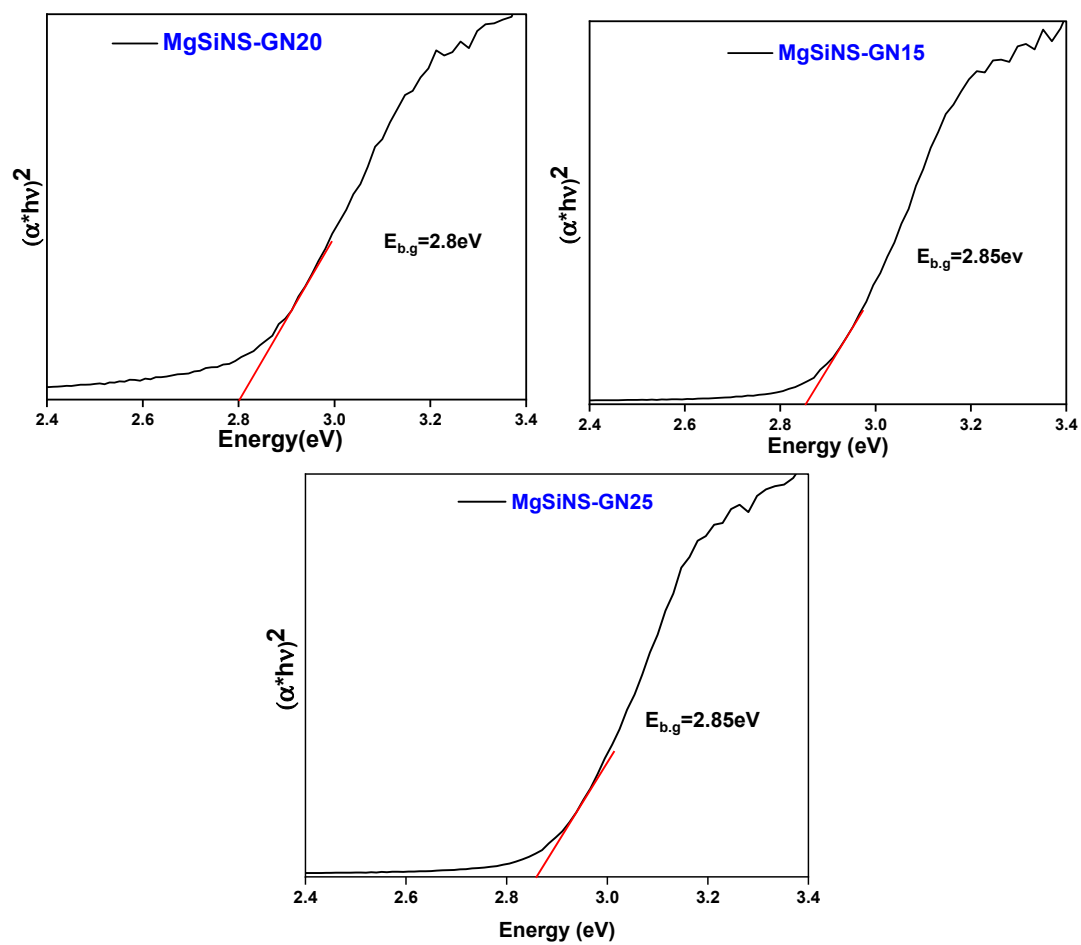

**Figure S1:** Tauc plots for all the synthesized materials

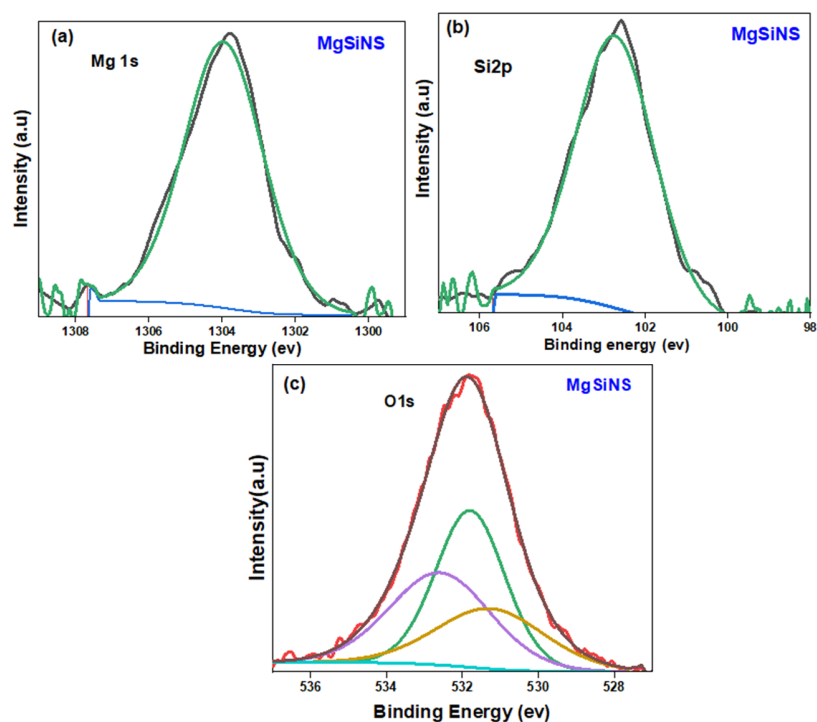

**Figure S2:** Deconvoluted XPS spectra for MgSiNS (a)  $Mg1s$ , (b)  $Si2p$  and (c)  $O1s$

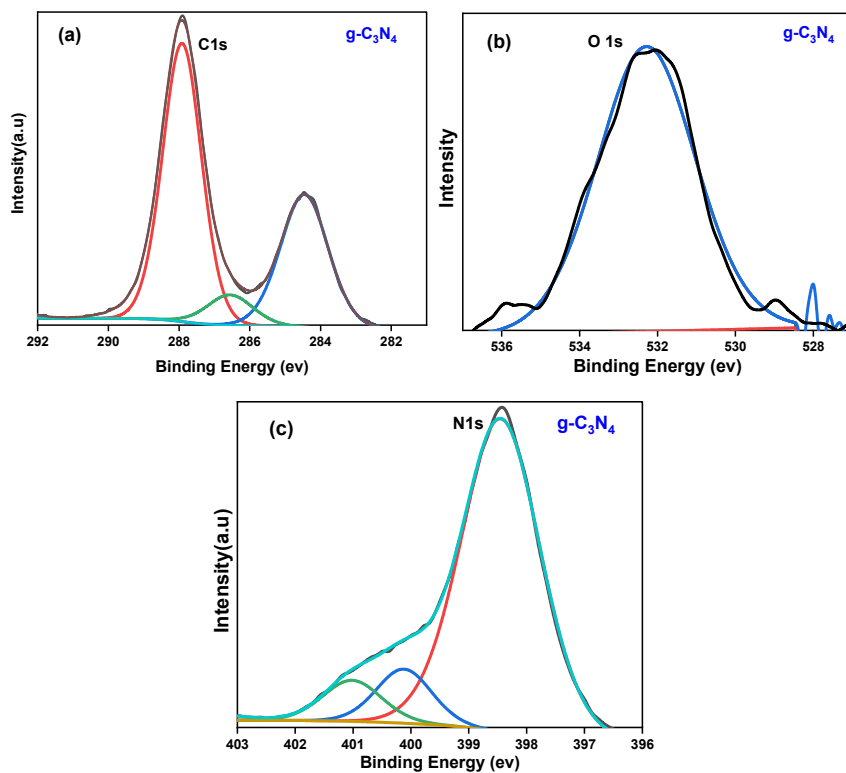

**Figure S3:** Deconvoluted XPS spectra for  $g-C_3N_4$  (a)  $C1s$  (b)  $O1s$  and (c)  $N1s$

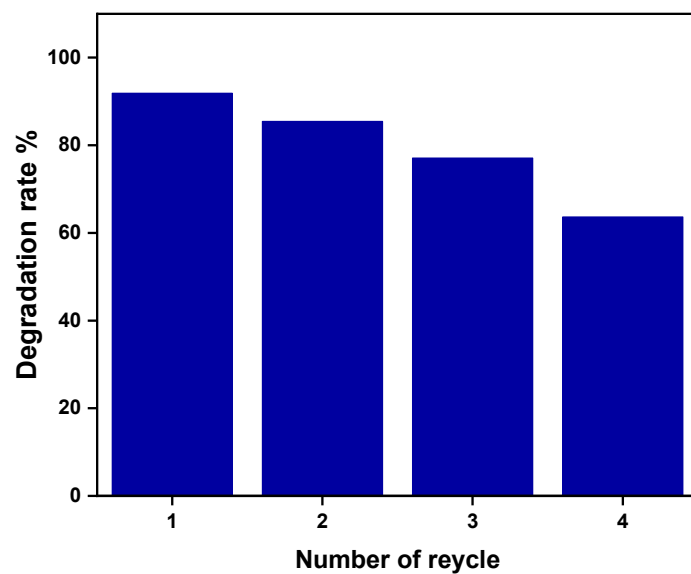

**Figure S4:** Recycling of MgSiNS-GN20 for photodegradation of MB

**Table S1:** Comparison of photocatalytic MB degradation performances of different catalysts

| Photocatalyst                                                         | MB concentration (mg/L) | MB volume (mL) | Removal efficiency (%) | Catalyst mass (g) | Time (min) | Reference |
|-----------------------------------------------------------------------|-------------------------|----------------|------------------------|-------------------|------------|-----------|
| HFC/SiO <sub>2</sub> /C <sub>3</sub> N <sub>4</sub>                   | 10                      | 20             | 94.6                   | 0.05              | 60         | [47]      |
| AgCl/Ag <sub>3</sub> PO <sub>4</sub> /g-C <sub>3</sub> N <sub>4</sub> | 20                      | 100            | 100                    | 0.05              | 20         | [48]      |
| LaO <sub>3</sub> /g-C <sub>3</sub> N <sub>4</sub>                     | 10                      | 50             | 100                    | 0.01              | 120        | [49]      |
| CeO <sub>2</sub> /GCN                                                 | 15                      | 100            | 97                     | 0.1               | 60         | [50]      |
| Fe <sub>3</sub> O <sub>4</sub> /ZnO                                   | 10                      | 50             | 88.5                   | 0.2               | 120        | [51]      |
| W-TiO <sub>2</sub> -SiO <sub>2</sub>                                  | 40                      | 500            | 99.9                   | 0.3               | 120        | [52]      |
| g-C <sub>3</sub> N <sub>4</sub> /ZnO                                  | 10                      | 50             | 73                     | 0.05              | 90         | [53]      |
| Ni/g-C <sub>3</sub> N <sub>4</sub>                                    | 30                      | 10             | 94                     | 0.01              | 60         | [54]      |
| FZSS@CN                                                               | 20                      | 100            | 95                     | 0.02              | 60         | [55]      |
| WO <sub>3</sub> /SiO <sub>2</sub>                                     | 5                       | 10             | 91                     | 0.01              | 120        | [56]      |
| MgSiNS-GN20                                                           | 10                      | 100            | 93                     | 0.1               | 200        | Our work  |
